# Supplementary material for: Biobased reactive diluent for UV-curable urethane acrylate oligomers for wood coating
Source: Springer Nature journal article supplement (doi:10.1007/s11998-014-9616-5), 2014-10-31
Supplement: MOESM1 [file 6026448]

**Supplementary Data**

**Gel permeation chromatography (GPC) analysis**

The molecular weight of UV curable oligomer (DESMOLUX VPLS 2265) was determined by GPC and it is showed in figure below.


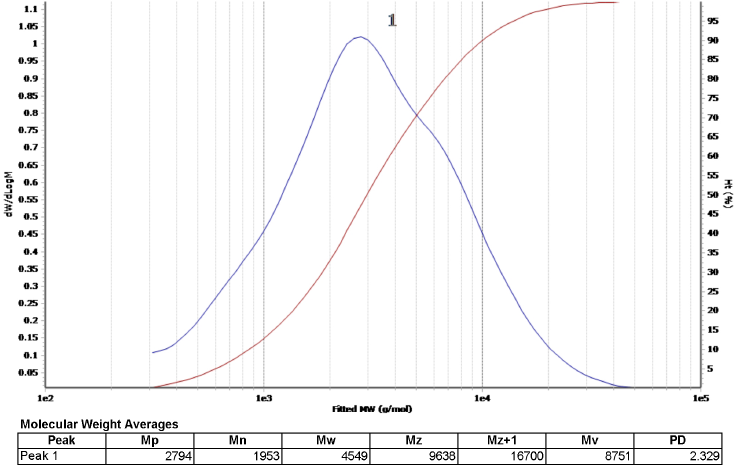


Figure: GPC analysis of UV curable oligomer (DESMOLUX VPLS 2265)
